# Supplementary material
Source: Springer Nature journal article supplement (https://www.springermedizin.de/resource/supplementary/12985_2014_2517_MOESM2_ESM.pdf/9606816)

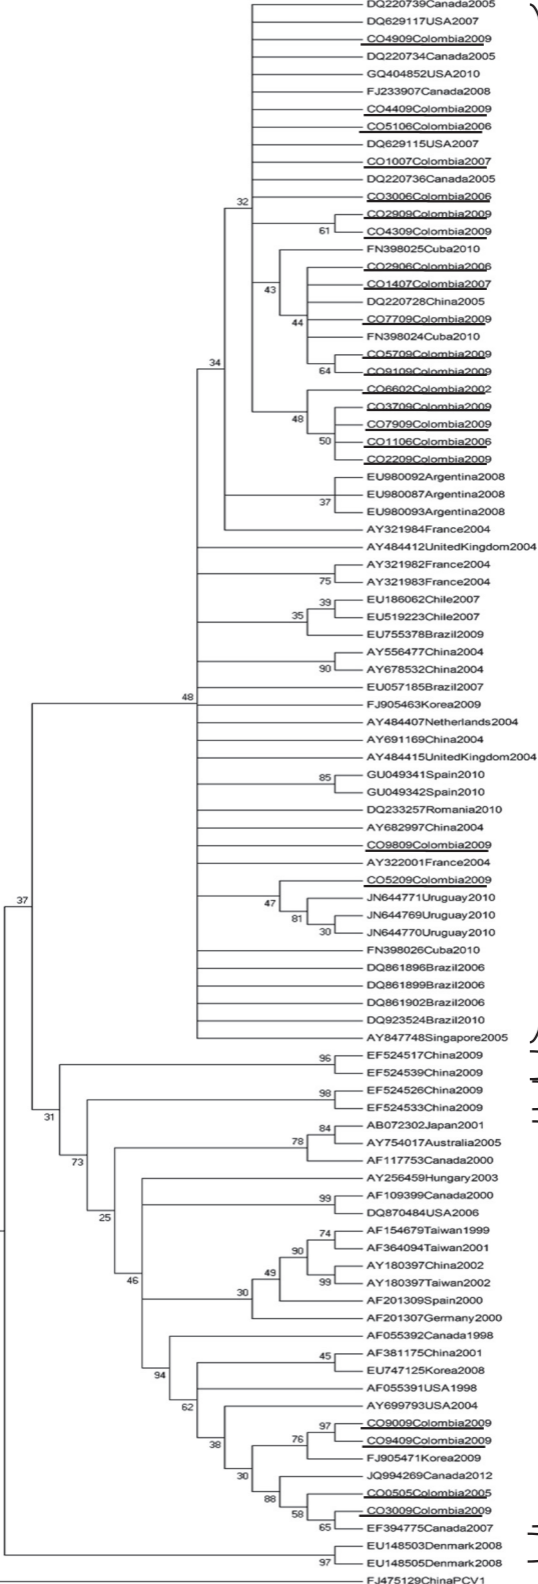

PCV2b

PCV2d

PCV2e

PCV2a

PCV2c

Supplement: MOESM2 [file 9606816]
